# Supplementary figures and images for: Autologous fecal microbiota transplantation impacts emphysema progression in an IL-17-independent manner
Source: Research Square preprint supplement (doi:10.21203/rs.3.rs-5567901/v1), 2024-12-12

**supplementary figure
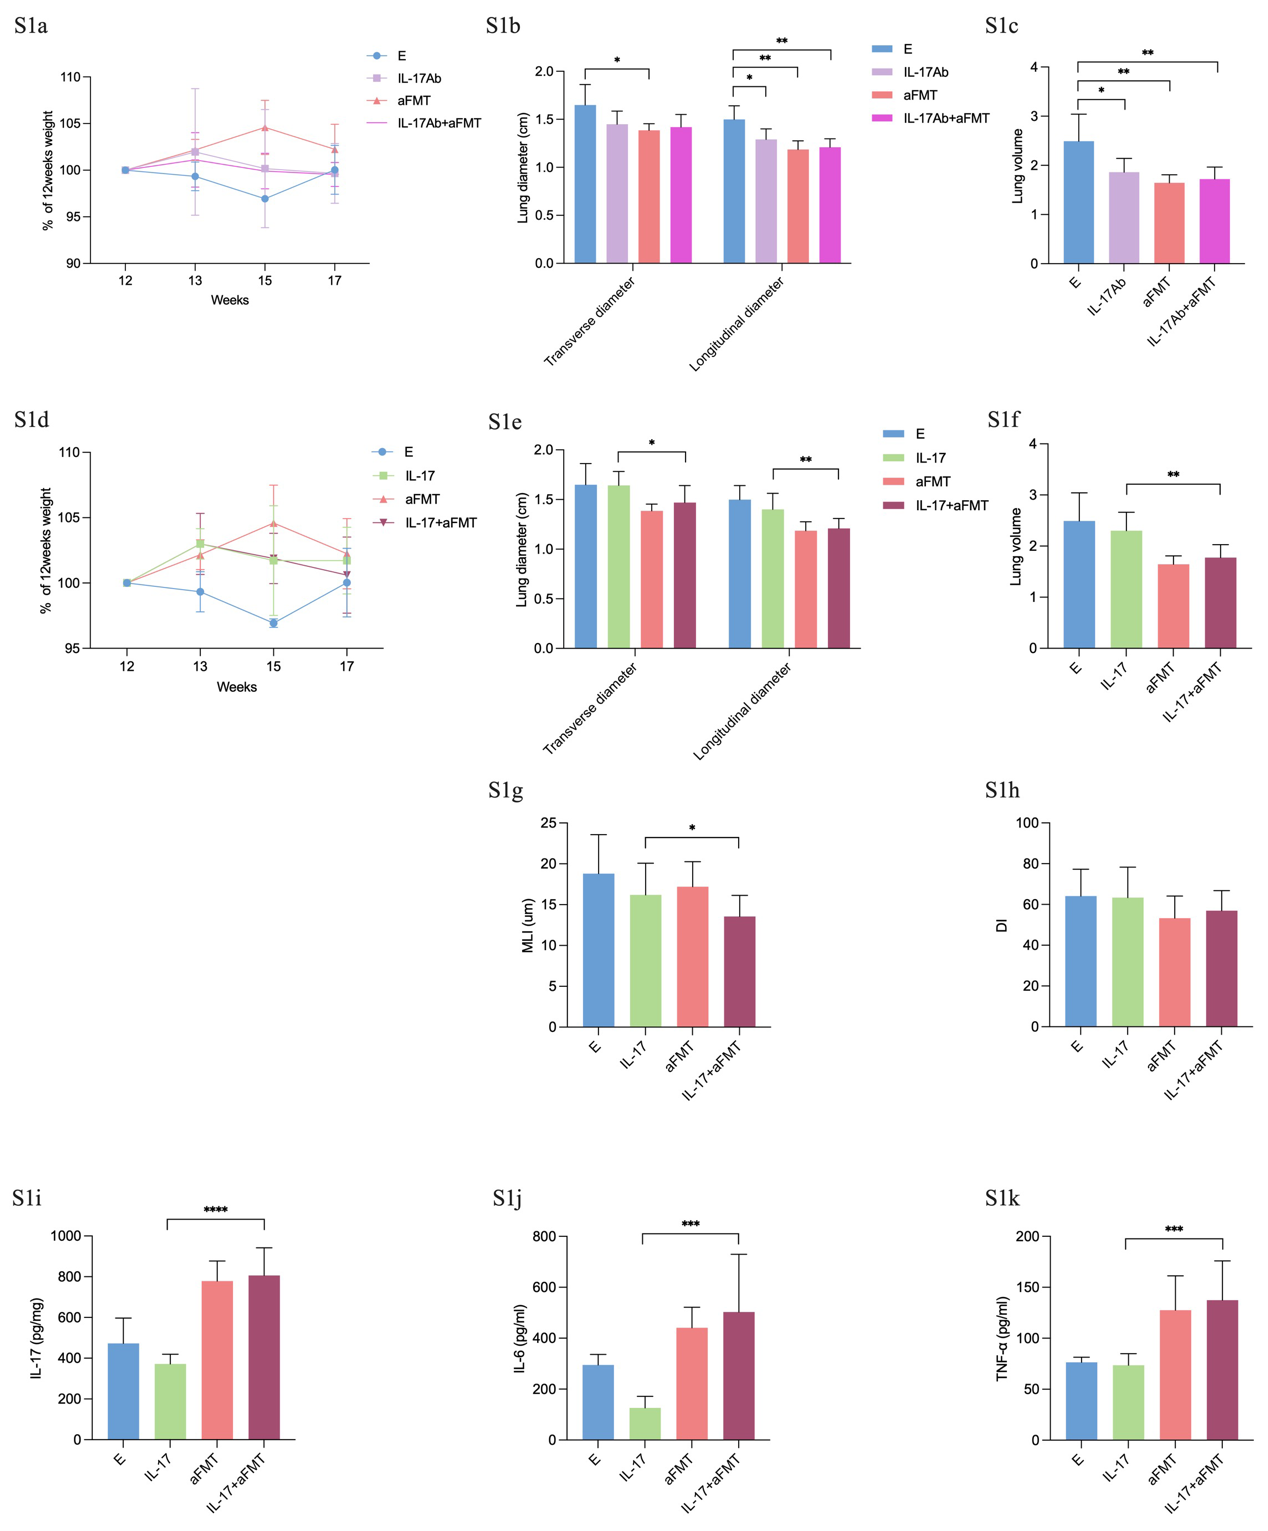
**

Supplement: Supplementary file 1 [file 9d204149b3a9f126f102ac59.docx]
